# Supplementary material for: Effects of Changes in Multiple Chronic Conditions on Medical Costs among Older Adults in South Korea
Source: MDPI journal article supplement (doi:10.3390/healthcare10040742), 2022-04-15
Supplement: s1 [file s1]

**Table S1.** Subgroup analysis for the association between the change of multiple chronic conditions and total medical cost

|                         | Change of multiple chronic conditions |         |          |         |          |         |           |        |
|-------------------------|---------------------------------------|---------|----------|---------|----------|---------|-----------|--------|
|                         | Bad→Bad                               |         | Bad→Good |         | Good→Bad |         | Good→Good | P*     |
|                         | β                                     | P-value | β        | P-value | β        | P-value | β         |        |
| Sex                     |                                       |         |          |         |          |         |           | 0.7972 |
| Men                     | 0.8810                                | <.0001  | 0.0606   | 0.5243  | 0.7242   | <.0001  | ref.      |        |
| Women                   | 0.6936                                | <.0001  | 0.0136   | 0.9004  | 0.5093   | <.0001  | ref.      |        |
| Age                     |                                       |         |          |         |          |         |           | 0.0883 |
| 60-69                   | 0.7226                                | <.0001  | -0.0785  | 0.4651  | 0.4764   | <.0001  | ref.      |        |
| 70-79                   | 0.8602                                | <.0001  | 0.0592   | 0.5626  | 0.7527   | <.0001  | ref.      |        |
| 80+                     | 0.6774                                | <.0001  | 0.3787   | 0.0177  | 0.7730   | 0.0047  | ref.      |        |
| Education               |                                       |         |          |         |          |         |           | 0.5931 |
| Less than middle school | 0.7857                                | <.0001  | -0.0279  | 0.7622  | 0.6205   | <.0001  | ref.      |        |
| High school or more     | 0.7715                                | <.0001  | 0.1147   | 0.3069  | 0.7334   | <.0001  | ref.      |        |
| Region                  |                                       |         |          |         |          |         |           | 0.3784 |
| Rural                   | 0.6400                                | <.0001  | -0.0218  | 0.8871  | 0.6975   | <.0001  | ref.      |        |
| City                    | 0.8332                                | <.0001  | 0.0518   | 0.5175  | 0.6307   | <.0001  | ref.      |        |
| Employment status       |                                       |         |          |         |          |         |           | 0.7453 |
| Unemployment            | 0.8153                                | <.0001  | 0.0410   | 0.5890  | 0.6330   | <.0001  | ref.      |        |
| Employment              | 0.7439                                | <.0001  | 0.0605   | 0.6322  | 0.7493   | <.0001  | ref.      |        |
| Household income        |                                       |         |          |         |          |         |           |        |
| 1Q                      | 0.9096                                | <.0001  | -0.0743  | 0.5622  | 0.5221   | 0.0001  | ref.      | 0.4928 |
| 2Q                      | 0.9467                                | <.0001  | 0.1775   | 0.1971  | 0.6630   | <.0001  | ref.      |        |
| 3Q                      | 0.7634                                | <.0001  | 0.0970   | 0.5290  | 0.8791   | <.0001  | ref.      |        |
| 4Q                      | 0.6430                                | <.0001  | -0.0546  | 0.6150  | 0.4917   | 0.0003  | ref.      |        |
| Marital status          |                                       |         |          |         |          |         |           | 0.6316 |
| Unmarried               | 0.8243                                | <.0001  | 0.0936   | 0.5200  | 0.7511   | <.0001  | ref.      |        |
| Married                 | 0.7567                                | <.0001  | 0.0202   | 0.8117  | 0.5798   | <.0001  | ref.      |        |
| BMI                     |                                       |         |          |         |          |         |           | 0.1567 |
| Underweight             | 1.0224                                | 0.0034  | 0.1703   | 0.5801  | 0.8384   | 0.0020  | ref.      |        |
| Normal                  | 0.8489                                | <.0001  | 0.0257   | 0.7711  | 0.7602   | <.0001  | ref.      |        |
| Obesity                 | 0.6609                                | <.0001  | 0.0618   | 0.6256  | 0.4150   | <.0001  | ref.      |        |

| Change of multiple chronic conditions |         |         |          |         |          |         |           |        |
|---------------------------------------|---------|---------|----------|---------|----------|---------|-----------|--------|
|                                       | Bad→Bad |         | Bad→Good |         | Good→Bad |         | Good→Good | P*     |
|                                       | β       | P-value | β        | P-value | β        | P-value | β         |        |
| Self-rated health                     |         |         |          |         |          |         |           | 0.0699 |
| Good                                  | 0.8647  | <.0001  | 0.0429   | 0.6556  | 0.9993   | <.0001  | ref.      |        |
| Bad                                   | 0.7388  | <.0001  | 0.0547   | 0.5745  | 0.5572   | <.0001  | ref.      |        |
| Current smoking status                |         |         |          |         |          |         |           | 0.9451 |
| Yes                                   | 0.6156  | <.0001  | 0.1260   | 0.6227  | 0.6393   | <.0001  | ref.      |        |
| No                                    | 0.8040  | <.0001  | 0.0284   | 0.7003  | 0.6539   | <.0001  | ref.      |        |
| Current alcohol consumption           |         |         |          |         |          |         |           | 0.3484 |
| Yes                                   | 0.6764  | <.0001  | 0.0481   | 0.6861  | 0.7175   | <.0001  | ref.      |        |
| No                                    | 0.8278  | <.0001  | 0.0594   | 0.4943  | 0.6385   | <.0001  | ref.      |        |
| Regular physical activity             |         |         |          |         |          |         |           | 0.8995 |
| Yes                                   | 0.8601  | <.0001  | 0.0957   | 0.3491  | 0.7390   | <.0001  | ref.      |        |
| No                                    | 0.7449  | <.0001  | 0.0064   | 0.9505  | 0.5853   | <.0001  | ref.      |        |
| ADL/IADL                              |         |         |          |         |          |         |           | 0.9508 |
| None                                  | 0.7966  | <.0001  | 0.0275   | 0.7145  | 0.6143   | <.0001  | ref.      |        |
| Mild                                  | 0.8901  | 0.0026  | 0.2420   | 0.5353  | 0.8829   | 0.0039  | ref.      |        |
| Severe                                | 0.1456  | 0.7142  | -0.0662  | 0.8954  | 0.0669   | 0.8513  | ref.      |        |

\*P-interaction
